# Supplementary material
Source: Springer Nature journal article supplement (https://www.springermedizin.de/resource/supplementary/13023_2012_507_MOESM1_ESM.pdf/9642486)
Supplement: MOESM1 [file 9642486]

## Supplemental Material

### Additional file 1: Electroretinogram (ERG) in patient B

|               | Dark-Adapted Dim Blue Single Flash Ampl ( $\mu$ V) | Dark-Adapted White Single Flash Ampl ( $\mu$ V) | Dark-Adapted White Single Flash IT (ms) | Dark-Adapted 30-Hz Flickering White Light Ampl ( $\mu$ V) | Dark-Adapted 30-Hz Flickering White Light IT (ms) |
|---------------|----------------------------------------------------|-------------------------------------------------|-----------------------------------------|-----------------------------------------------------------|---------------------------------------------------|
| Patient RE/LE | 58.6/44.3                                          | 198/142                                         | 46.2/43.2                               | 42.9/26.9                                                 | 37.5/34.5                                         |
| Normal values | 51-281                                             | 219-511                                         | 40-56                                   | 22-104                                                    | 26-32.6                                           |

RE = right eye, LE = left eye, Ampl = amplitude, IT = implicit time.
